# Supplementary material
Source: PubMed Central journal article supplement (PMC6647333)
Supplement: ao8b03571_si_001.pdf [file ao8b03571_si_001.pdf]

## Supporting Information

### Methionine Attenuates Lipopolysaccharide-induced Inflammatory Responses via DNA Methylation in Macrophages

Jian Ji<sup>†</sup>, Yibin Xu<sup>†</sup>, Mingzhu Zheng<sup>2</sup>, Chenglong Luo<sup>1</sup>, Huangtao Lei<sup>1</sup>, Hao Qu<sup>1</sup>,  
Dingming Shu<sup>1\*</sup>

<sup>1</sup>State Key Laboratory of Livestock and Poultry Breeding, Guangdong Key Laboratory of Animal Breeding and Nutrition, Institute of Animal Science, Guangdong Academy of Agricultural Sciences, Guangzhou, China

<sup>2</sup>Molecular and Cellular Immunoregulation Section, Laboratory of Immune System Biology, National Institute of Allergy and Infectious Diseases, National Institutes of Health, USA

<sup>†</sup>Co-first author

\* Correspondence: Dingming Shu, [shudingming@gdaas.cn](mailto:shudingming@gdaas.cn).

Author's affiliation:

<sup>1</sup> State Key Laboratory of Livestock and Poultry Breeding, Guangdong Key Laboratory of Animal Breeding and Nutrition, Institute of Animal Science, Guangdong Academy of Agricultural Sciences, 1 Dafeng 1st Street, Wushan, Tianhe District, Guangzhou, Guangdong, China, 510640

<sup>2</sup> Molecular and Cellular Immunoregulation Section, Laboratory of Immune System Biology, National Institute of Allergy and Infectious Diseases, National Institutes of Health, Bethesda, MD 20892

**Heading: Methionine attenuates inflammation**

Figure S1

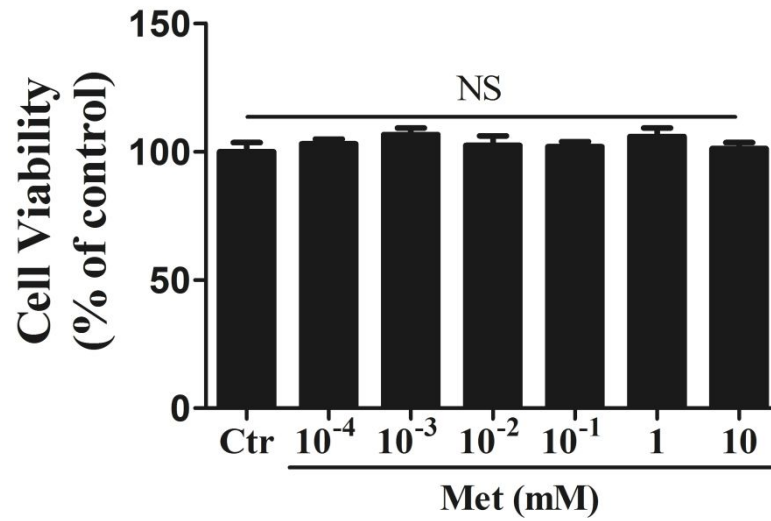

**Figure S1. Different concentrations of Met have no effect on the viability of RAW 264.7 cells.** The Effect of methionine on the cell viability using the Cell Counting Kit-8 (CCK-8) assay. RAW264.7 cells were cultured with Met (0-10 mM) for 24 h. Data are mean  $\pm$  SD for at least three independent experiments. Comparisons between means used *t* tests ( $*p < 0.05$ ,  $**p < 0.01$ ,  $***p < 0.001$ ).

Figure S2

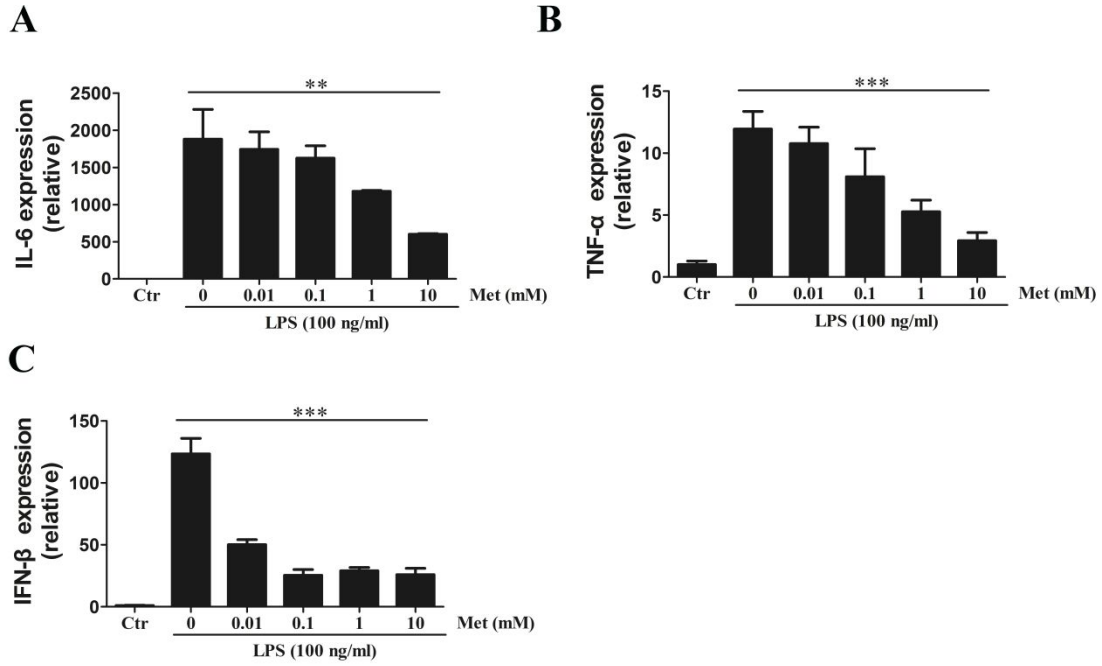

**Figure S2. Effects of Met at different concentrations on LPS-induced inflammatory cytokines in RAW 264.7 cells.** RAW264.7 cells were pretreated with different concentrations (0-10mM) of Met for 12 h prior to stimulation with 100 ug/ml of LPS for 3 h. Gene expression of IL-6 (A), IFN- $\beta$  (B), TNF- $\alpha$  (C) was analyzed by RT-qPCR. Data shown represents three independent experiments. Data are shown as mean  $\pm$  SD for three independent experiments, Comparisons between means used *t* tests ( $*p < 0.05$ ,  $**p < 0.01$ ,  $***p < 0.001$ ).
